# Supplementary material for: Impact of 1 mmol dm−3 concentrations of small molecules containing nitrogen-based cationic groups on the oxygen reduction reaction on polycrystalline platinum in aqueous KOH (1 mol dm−3)
Source: Royal Society of Chemistry journal article supplement (doi:10.1039/c3cp50556a), 2013-01-01
Supplement: c3cp50556a.pdf [file c3cp50556a.pdf]

## Electronic Supplemental Information (ESI)

### Impact of 1 mmol dm<sup>-3</sup> concentrations small molecules containing nitrogen-based cationic groups on the oxygen reduction reaction on polycrystalline platinum in aqueous KOH (1 mol dm<sup>-3</sup>).

Ai Lien Ong,\* Daniel K. Whelligan, Michael L. Fox, and John R. Varcoe

#### Synthetic Schemes

BOTMHA and BAABCO were synthesised as shown in Scheme ESI1 and scheme ESI2, respectively.

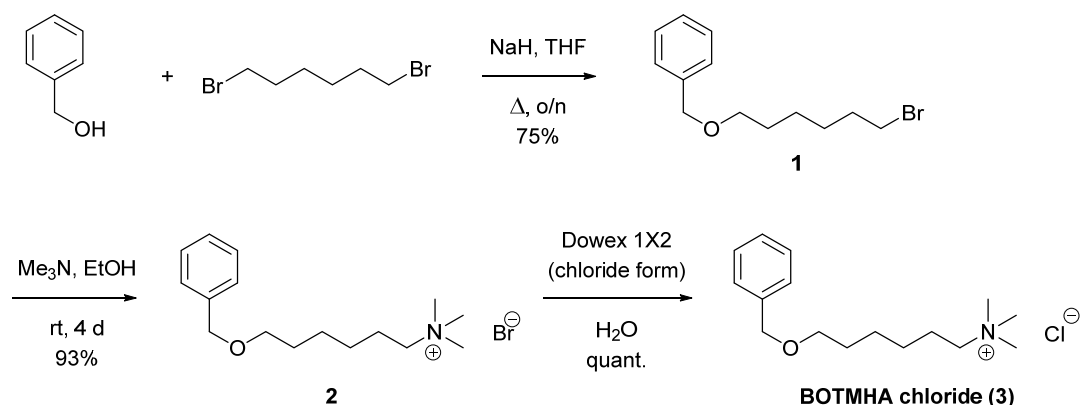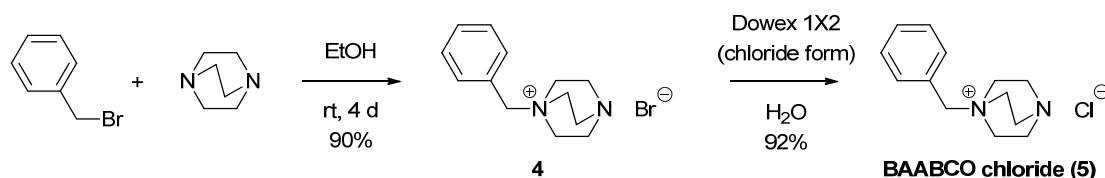

#### General Experimental

Starting materials, reagents and solvents for reactions were reagent grade and, unless otherwise stated, used as purchased. THF was distilled from sodium benzophenone ketyl under nitrogen. Infra-red (IR) spectra were recorded in the range 600-4000 cm<sup>-1</sup> using an Agilent Clary 600 FTIR spectrometer fitted with a MKII Golden Gate Single Reflection ATR System. NMR spectra were obtained on a Bruker 500 MHz spectrometer. <sup>1</sup>H NMR spectra were referenced to TMS at 0 ppm. The data is given as follows: chemical shift ( $\delta$ ) in ppm, integration, multiplicity, coupling constants ( $J$ , accurate to 0.5 Hz), assignment (if deduced using COSY and HSQC). <sup>13</sup>C spectra were referenced to TMS at 0 ppm. The data is given as follows: chemical shift ( $\delta$ ) in ppm, multiplicity. GCMS spectra were recorded on an Agilent 7890A GC system connected to an Agilent 5975C inert XL EI/CI with Triple-Axis Detectors. GC conditions were as follows: inj. vol. 1  $\mu$ L, inj. temp. 250  $^{\circ}$ C, column Zebtron ZB-5MS (30 m  $\times$  0.25 mm), oven temperature gradient 0-3 min, 50  $^{\circ}$ C; 3-23 min, 50-250  $^{\circ}$ C (10  $^{\circ}$ C ramp per minute); 23-35 min, 250  $^{\circ}$ C. High-resolution mass spectrometry (HRMS) was performed on a Waters QTOF Premier with electrospray ionisation. Elemental analysis was performed by Exeter Analytical Service, UK.

### Benzyl 6-bromohexyl ether (**1**)

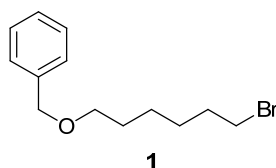

To a stirred solution of benzyl alcohol (0.81 g, 7.53 mmol) and 1,6-dibromohexane (14.7 g, 60.2 mmol) in THF (203 mL) was added NaH (60% w/w suspension in oil, 1.81 g, 75.3 mmol) portionwise.<sup>1</sup> The reaction mixture was heated at reflux overnight then filtered through celite and the solvent evaporated. Silica gel flash column chromatography (gradient elution, hexane only, hexane/ethyl acetate 97:3, 80:20) gave the title compound as a colourless oil (1.52 g, 75%);  $R_f$  (hexane/ethyl acetate 95:5) 0.6; IR ( $\text{cm}^{-1}$ ) 2934, 2856, 1453, 1361, 1099;  $^1\text{H-NMR}$  ( $\text{CDCl}_3$ ) 7.36-7.32 (4H, m), 7.29-7.26 (1H, m), 4.50 (2H, s), 3.47 (2H, t,  $J = 7$  Hz), 3.40 (2H, t,  $J = 7$  Hz), 1.86 (2H, pentet,  $J = 7$  Hz), 1.63 (2H, pentet,  $J = 7$  Hz), 1.48-1.37 (4H, m);  $^{13}\text{C NMR}$  ( $\text{CDCl}_3$ ) 138.6, 128.4, 127.6, 127.5, 72.9, 70.2, 33.9, 32.8, 29.6, 28.0, 25.4; GCMS (EI) 18.8 min,  $m/z = 272$  (0.3%), 270 (0.3%), 181 (0.5%), 179 (0.5%), 163 (1%), 161 (1%), 118 (2%), 108 (6%), 107 (6%), 92 (71%), 91 (100%).  $^1\text{H NMR}$  and MS data is in approximate agreement with that given in the literature.<sup>2</sup>

### 6-(Benzyloxy)-*N,N,N*-trimethylhexan-1-aminium bromide (**2**)

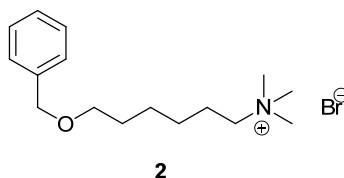

Bromo-ether **1** (0.4 g, 1.48 mmol) was dissolved in ethanol (10 mL). Trimethylamine solution (31% w/w in ethanol, 3.1 mL, 12.9 mmol) was added and the mixture was stirred at room temperature for 4 d.<sup>3</sup> The solvent was evaporated, the mixture was dissolved in water (30 mL) and the resulting aqueous solution was washed with diethyl ether ( $3 \times 30$  mL). The aqueous phase was lyophilised and the resulting pinkish-white solid was washed with diethyl ether and dried under high vacuum to give the title product (0.43 g, 93%); m.p. 143 °C (sharp); IR ( $\text{cm}^{-1}$ ) 3004, 2926, 2861, 1494, 1478, 1450, 1366, 1124;  $^1\text{H-NMR}$  (MeOD) 7.37-7.34 (4H, m), 7.32-7.28 (1H, m), 4.51 (2H, s), 3.54 (2H, t,  $J = 6$  Hz), 3.37-3.33 (2H, m), 3.14 (9H, s), 1.84-1.78 (2H, m), 1.70-1.64 (2H, m), 1.54-1.47 (2H, m), 1.45-1.39 (2H, m);  $^{13}\text{C NMR}$  (MeOD) 139.8, 129.4, 128.9, 128.7, 73.9, 71.2, 67.8 (t,  $J_{\text{CN}} = 2.7$  Hz), 53.5 (t,  $J_{\text{CN}} = 4.0$  Hz), 30.4, 27.1, 26.8, 23.8; HRMS (ESI) (not done).

### 6-(Benzyloxy)-*N,N,N*-trimethylhexan-1-aminium chloride (BOTMHA chloride, **3**)

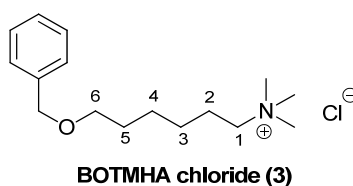

Bromide salt **2** (52 mg, 0.16 mmol) was dissolved in deionised water (~0.2 mL) and passed through a column containing Dowex® 1X2 (chloride form, 200-400 mesh, wet bed volume 0.7 mEq/mL) anion exchange resin (1 mL wet volume).<sup>4</sup> The column was eluted with deionised water (20 mL) and fractions containing product (UV active TLC spot) were combined and lyophilised to give the product (45 mg, quantitative); IR ( $\text{cm}^{-1}$ ) 2935, 2855, 1481, 1451, 1365, 1122;  $^1\text{H-NMR}$  (MeOD) 7.35-7.32 (4H, m, Ph), 7.30-7.25 (1H, m, Ph), 4.49 (2H, s,  $\text{PhCH}_2$ -), 3.51 (2H, t,  $J = 6.5$  Hz, 6-H), 3.31 (2H, m, 1-H), 3.11 (9H, s,  $-\text{N}(\text{CH}_3)_3$ ), 1.79 (2H, m, 2-H), 1.65 (2H, m, 5-H), 1.49 (2H, m, 4-H), 1.40 (2H, m, 3-H);  $^{13}\text{C NMR}$  (MeOD) 139.8 (Ph), 129.4 (Ph), 128.9 (Ph), 128.7 (Ph), 73.9 ( $-\text{CH}_2\text{Ph}$ ), 71.2 (6-C), 67.8 (t,  $J_{\text{CN}} = 2.7$  Hz, 1-C), 53.5 (t,  $J_{\text{CN}} = 4.0$  Hz,  $-\text{N}(\text{CH}_3)_3$ ), 30.4 (5-C), 27.1 (3-C), 26.8 (4-C), 23.8 (2-C); HRMS (ESI) found  $[\text{M}^+]$  250.2174,  $\text{C}_{16}\text{H}_{28}\text{NO}$   $[\text{M}^+]$  requires 250.2171; elemental analysis found C, 60.58; H, 9.85; Cl, 11.78; N, 4.45,  $\text{C}_{16}\text{H}_{28}\text{ClNO}$  requires C, 67.23; H, 9.87; Cl, 12.40; N, 4.90. The poor correlation of the elemental analysis reflects the hygroscopic nature of the compound. However the C:Cl ratio of 5.14:1 (5.4:1 is required) shows the salt has been entirely converted to the chloride form.

#### 1-Benzyl-4-aza-1-azoniabicyclo[2.2.2]octane bromide (**4**)

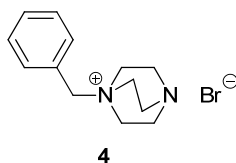

Benzylbromide (3.02 g, 0.018 mol) was dissolved in ethanol (30 mL). 1,4-diazabicyclo[2.2.2]octane (DABCO, 2.52 g, 0.023 mol) was added and the mixture was stirred at room temperature for 4 d. The solvent was evaporated, the mixture was dissolved in water (200 mL) and the resulting aqueous solution was washed with diethyl ether (3 × 200 mL). The aqueous phase was lyophilised and the resulting solid was washed with diethyl ether and dried under high vacuum to give the product as a white solid (4.6 g, 90%); m.p. 225 °C (sharp); IR (cm<sup>-1</sup>) 2961, 2889, 1454, 1314; <sup>1</sup>H-NMR (MeOD) 7.56-7.51 (5H, m), 4.54 (2H, s), 3.44 (6H, t (broad), *J* = 7.5 Hz), 3.18 (6H, t (broad), *J* = 7.5 Hz); <sup>13</sup>C NMR (MeOD) 134.4, 131.9, 130.5, 127.9, 69.3, 53.5, 46.2; HRMS (ESI) found [M<sup>+</sup>] 203.1535, C<sub>13</sub>H<sub>18</sub>N<sub>2</sub> [M<sup>+</sup>] requires 203.1548.

#### 1-Benzyl-4-aza-1-azoniabicyclo[2.2.2]octane chloride (BAABCO chloride, **5**)

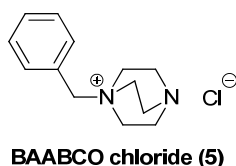

Bromide salt **4** (1.53 g, 5.69 mmol) was dissolved in deionised water and passed through a column containing Dowex® 1X2 (chloride form, 200-400 mesh) anion exchange resin (30 g).<sup>4</sup> The resulting aqueous solution was lyophilised to give the product as a fine, white powder (1.25 g, 92%); m.p. 153 °C (sharp); IR (cm<sup>-1</sup>) 2977, 2946, 2896, 1609, 1459, 1217, 1054; <sup>1</sup>H-NMR (MeOD) 7.57-7.51 (5H, m), 4.50 (2H, s), 3.40 (6H, t (broad), *J* = 7.5 Hz), 3.17 (6H, t (broad), *J* = 7.5 Hz); <sup>13</sup>C NMR (MeOD) 134.4, 131.9, 130.5, 127.8, 69.4, 53.6, 46.2; HRMS (ESI) found [M<sup>+</sup>] 203.1540, C<sub>13</sub>H<sub>19</sub>N<sub>2</sub> [M<sup>+</sup>] requires 203.1548; elemental analysis found C, 60.20; H, 8.14; Cl, 13.79; N, 10.85, C<sub>13</sub>H<sub>19</sub>ClN requires C, 65.40; H, 8.02; Cl, 14.85; N, 11.73. The poor correlation of the elemental analysis reflects the hygroscopic nature of the compound. However the C:Cl ratio of 4.37:1 (4.4:1 is required) shows the salt has been entirely converted to the chloride form.

#### References to the ESI

- (1) Yuan, Z.; Chen, J.; Zeng, Y.; Li, Y.-Y.; Han, Y.; Li, Y. *Org. Biomol. Chem.* 2011, **9**, 6256.
- (2) Tsuda, Y.; Hosoi, S.; Goto, Y. *Chem. Pharm. Bull.* 1991, **39**, 18.
- (3) Menger, F. M.; Shi, L. *J. Am. Chem. Soc.* 2006, **128**, 9338.
- (4) Zhang, J.; Jing, B.; Janout, V.; Regen, S. L. *Langmuir* 2007, **23**, 8709.

NMR ESI1 Benzyl 6-bromohexyl ether (1)

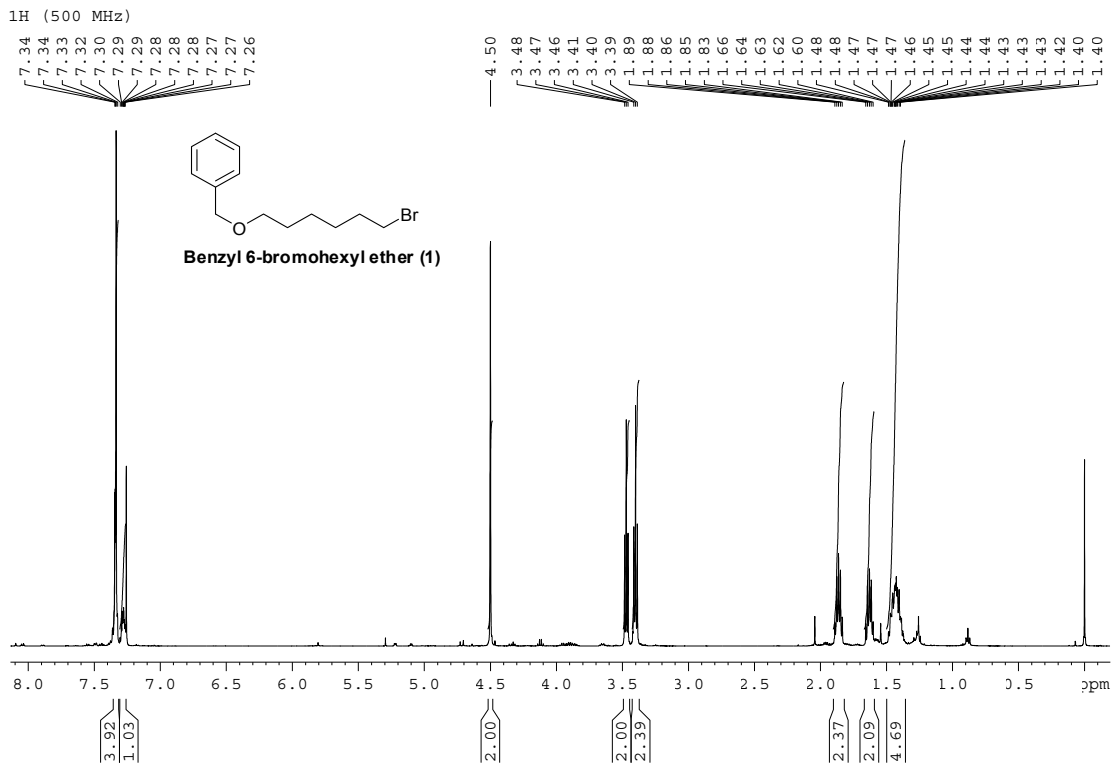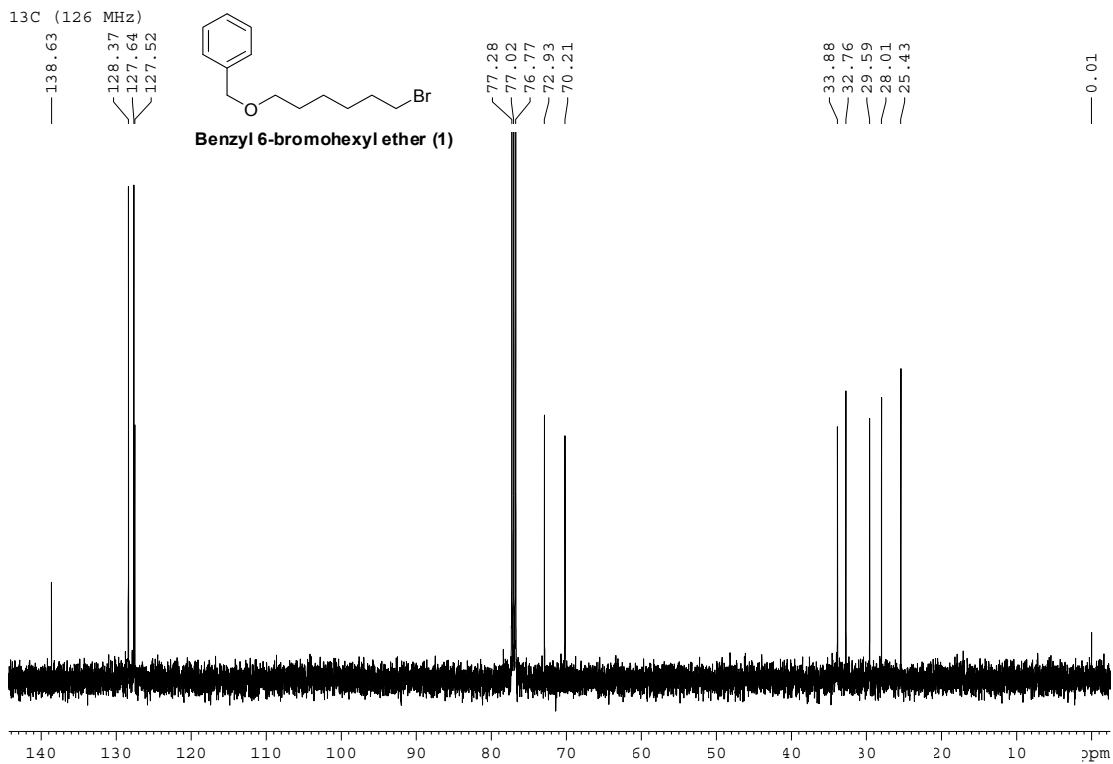

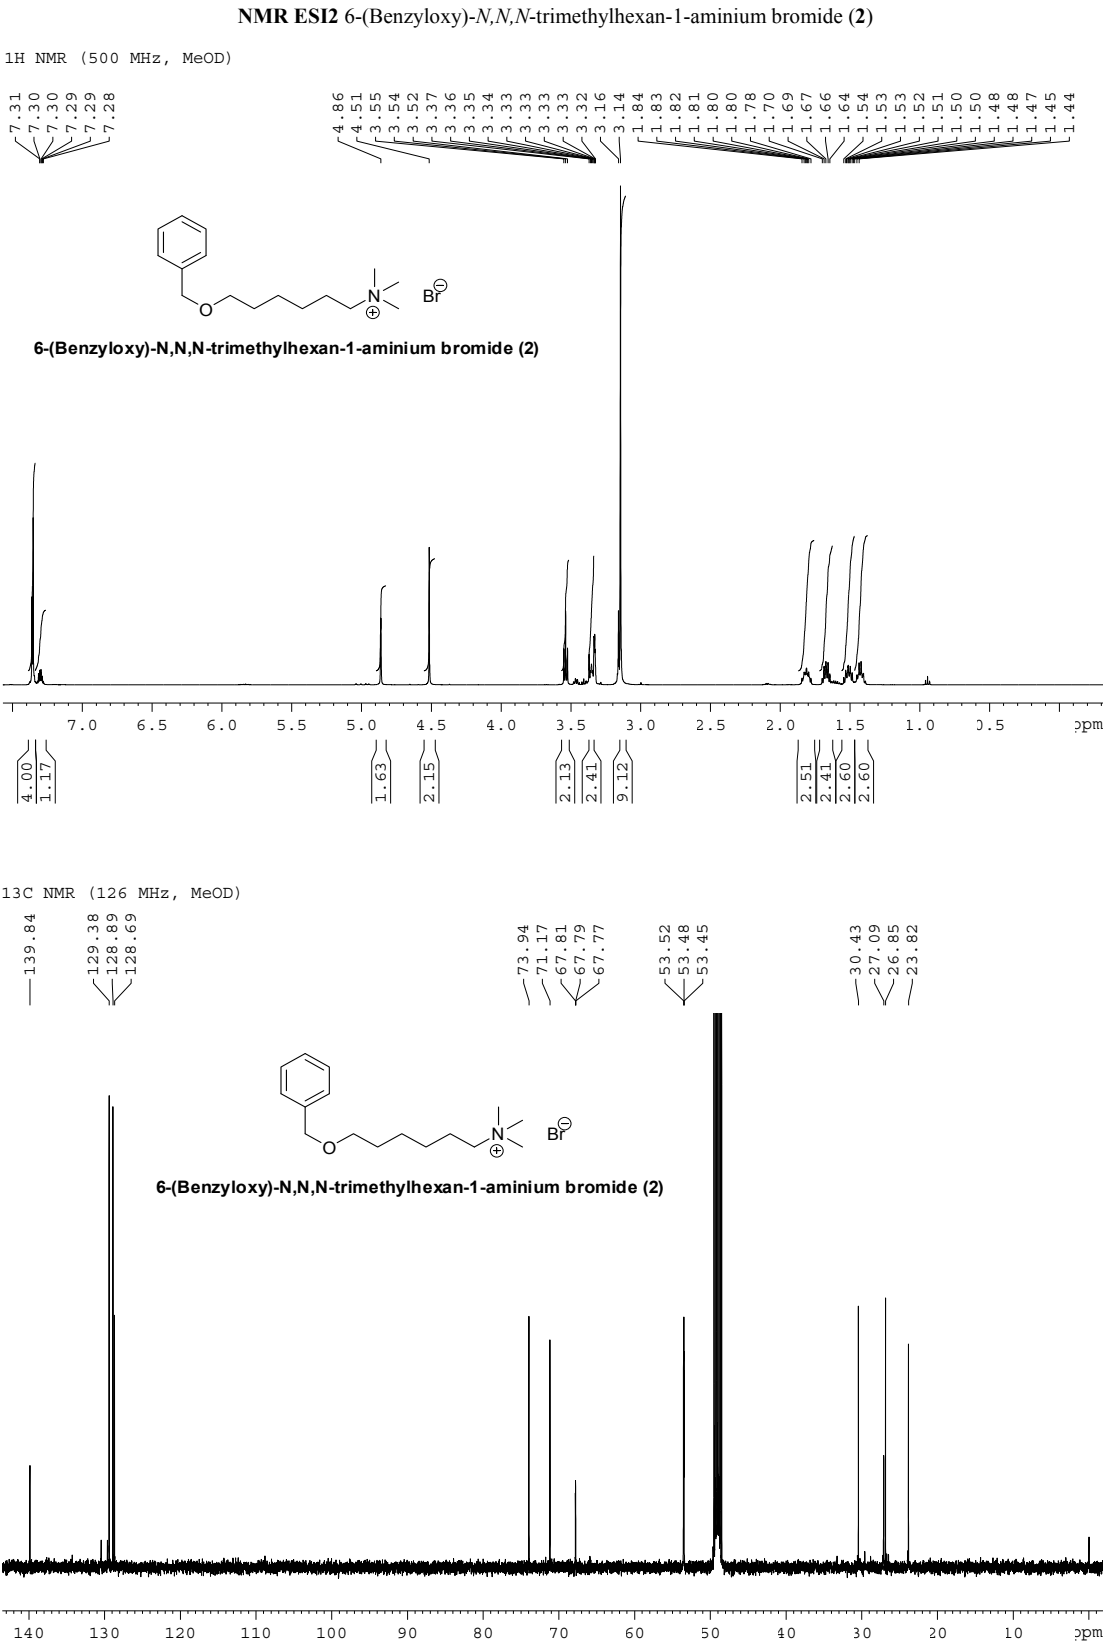

**NMR ESI3 1-Benzyl-4-aza-1-azoniabicyclo[2.2.2]octane chloride (BOTMHA chloride, 4)**

<sup>1</sup>H NMR (500 MHz, MeOD)

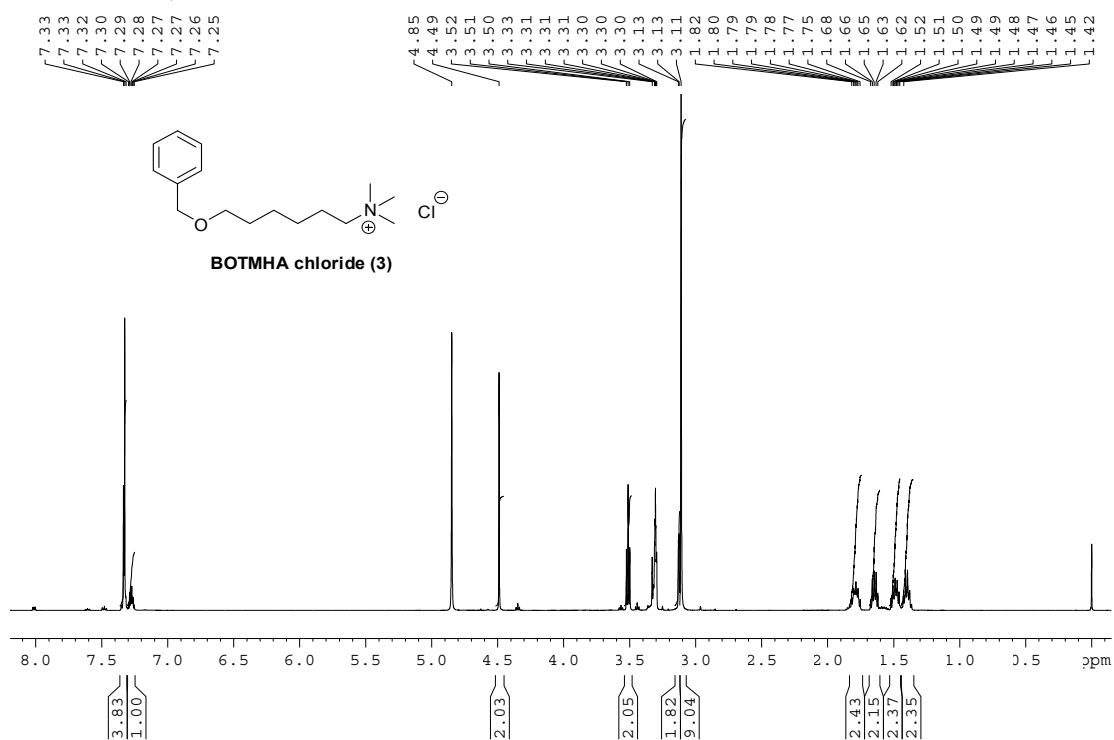

<sup>13</sup>C NMR (126 MHz, MeOD)

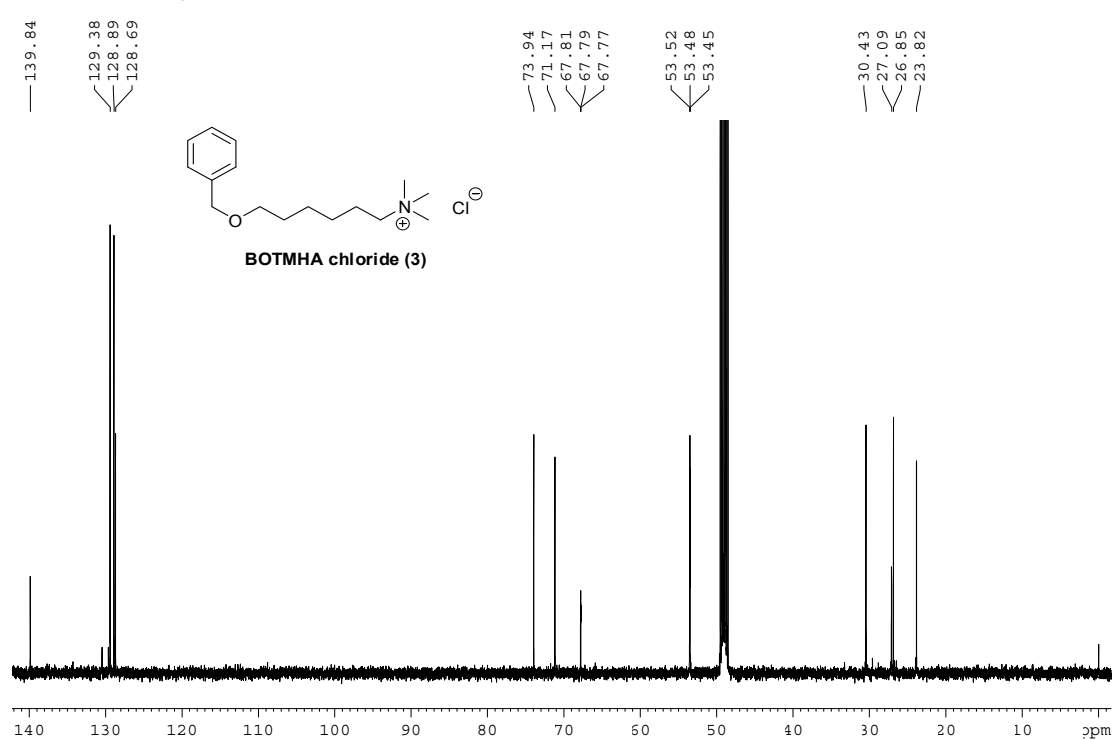

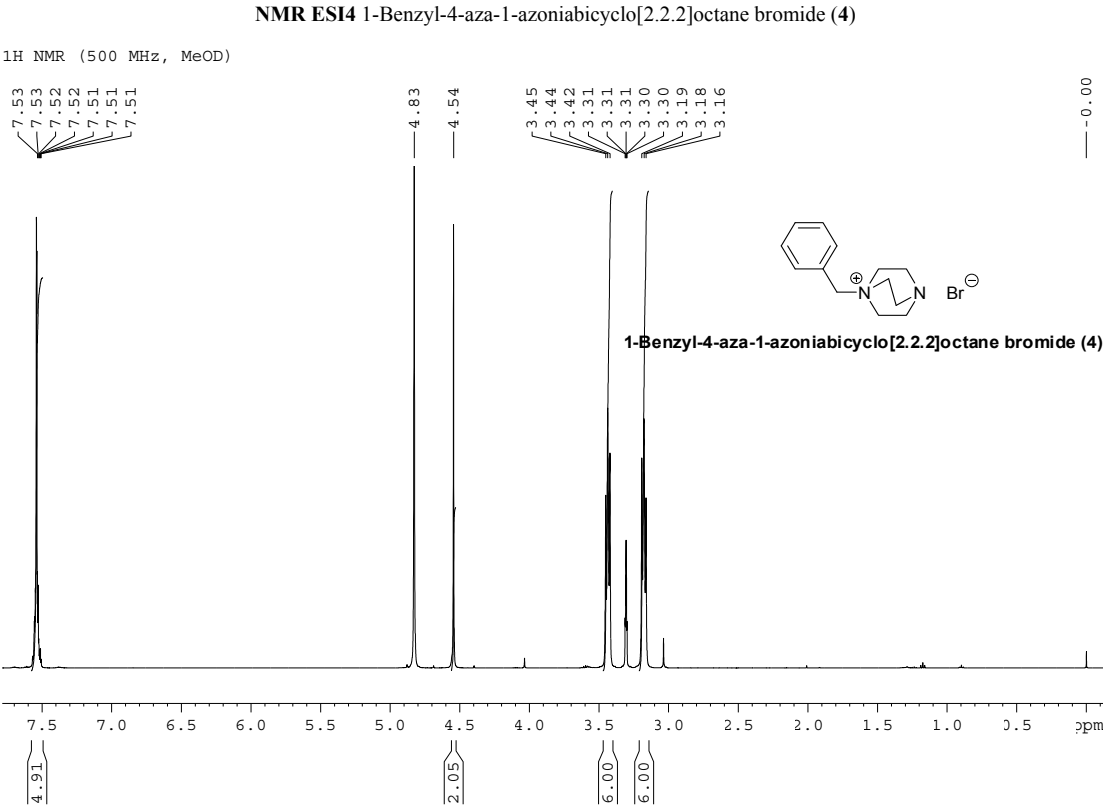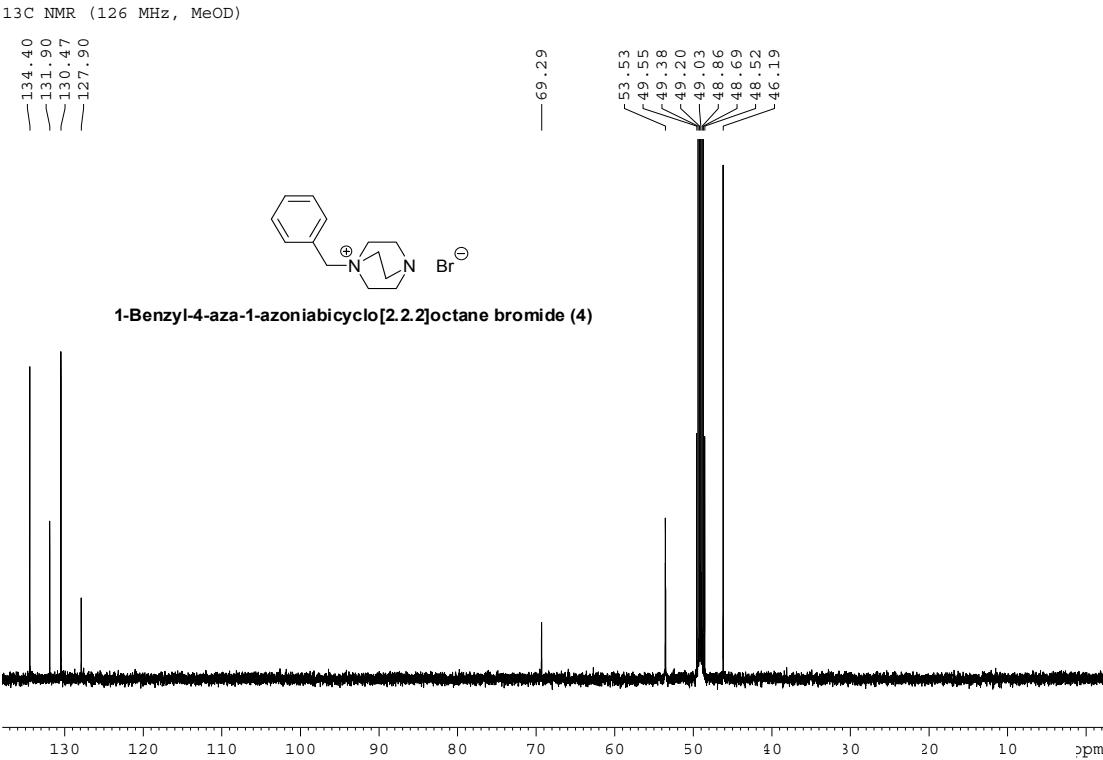

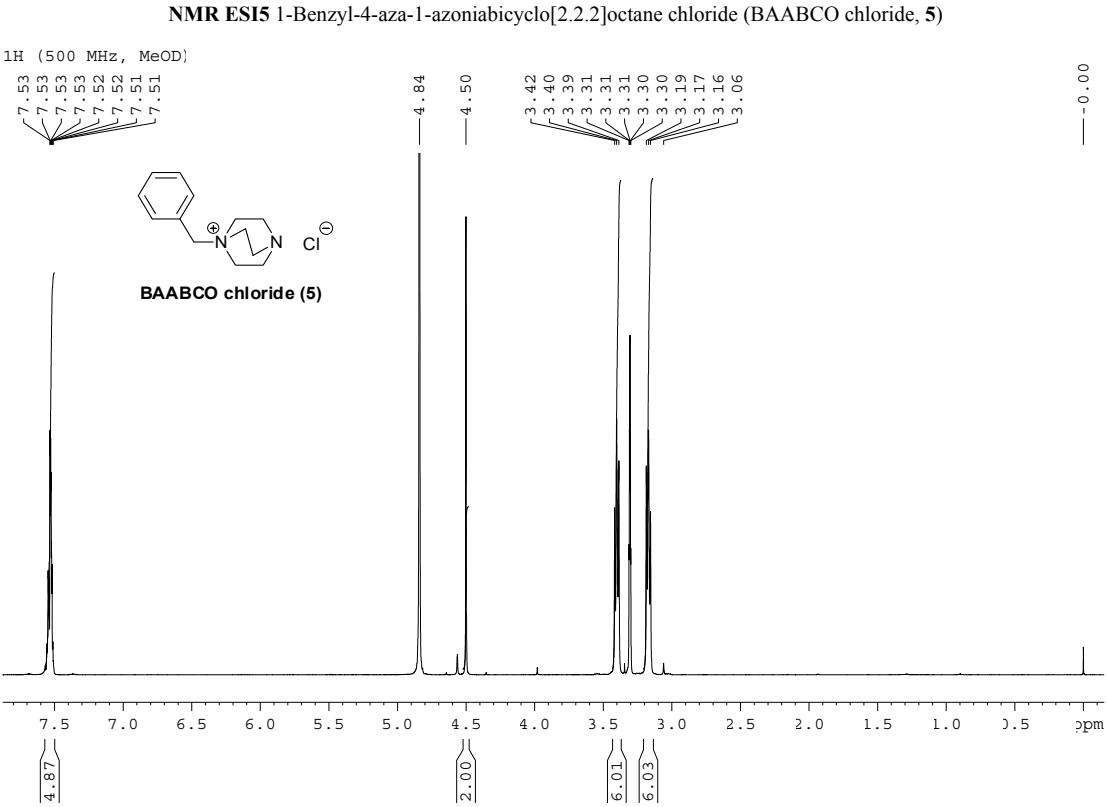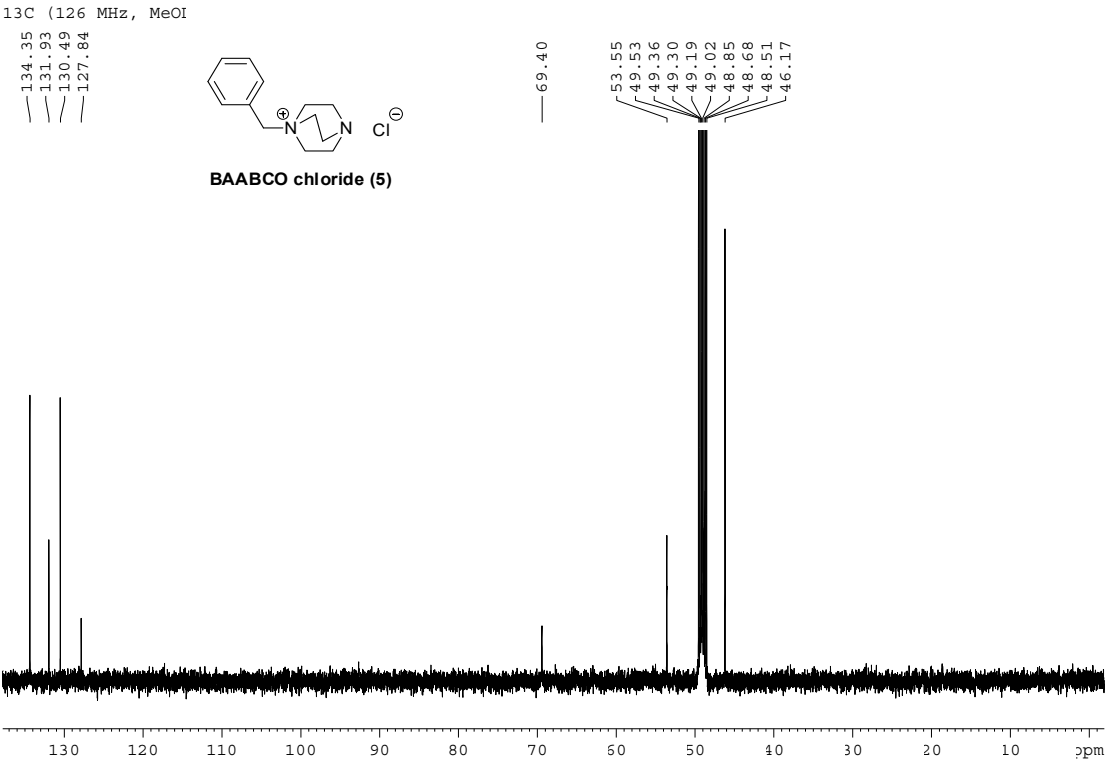

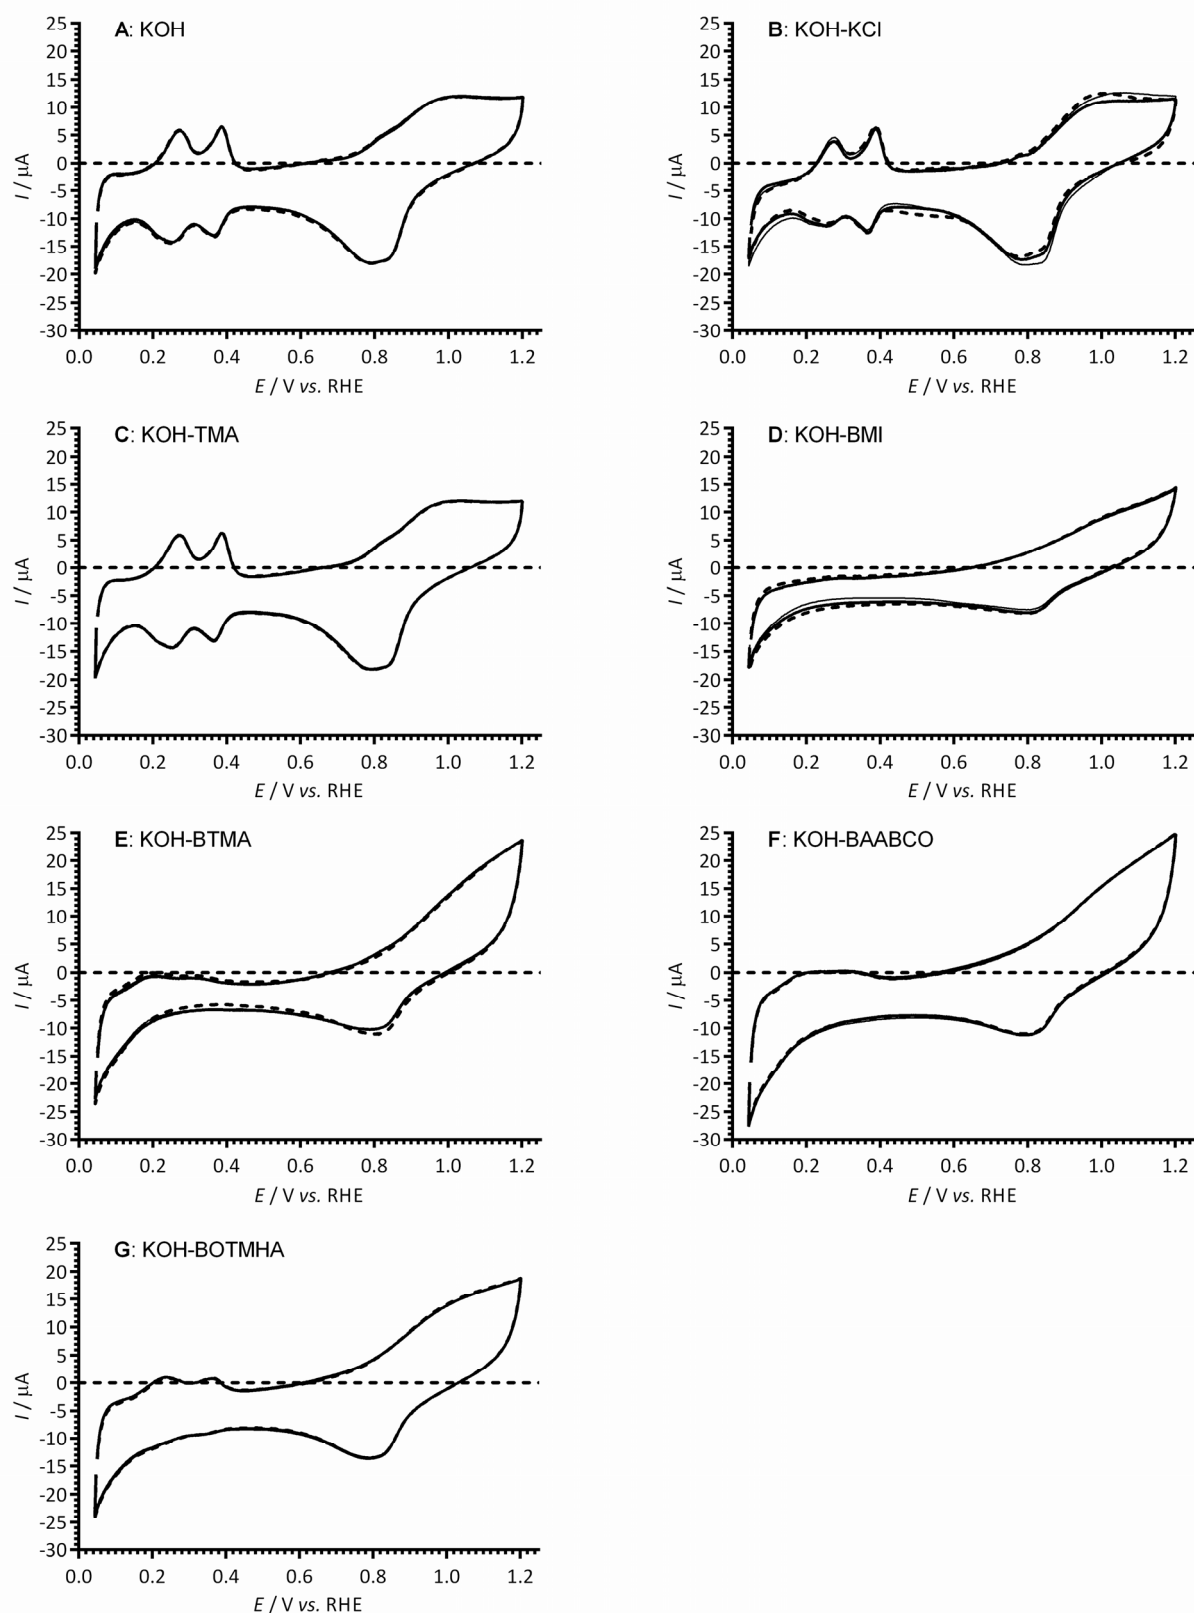

**Fig. ESI1** The three repeat cyclic voltammograms of a polycrystalline Pt disk electrode in  $\text{N}_2$ -saturated aqueous KOH ( $1 \text{ mol dm}^{-3}$ ) electrolytes at  $25^\circ\text{C}$  with and without addition of  $1 \text{ mmol dm}^{-3}$  of KCl or model cationic head-group molecules. Scan rate =  $50 \text{ mV s}^{-1}$ . This is the raw data linked to Figures 1 and 2 in the main article.

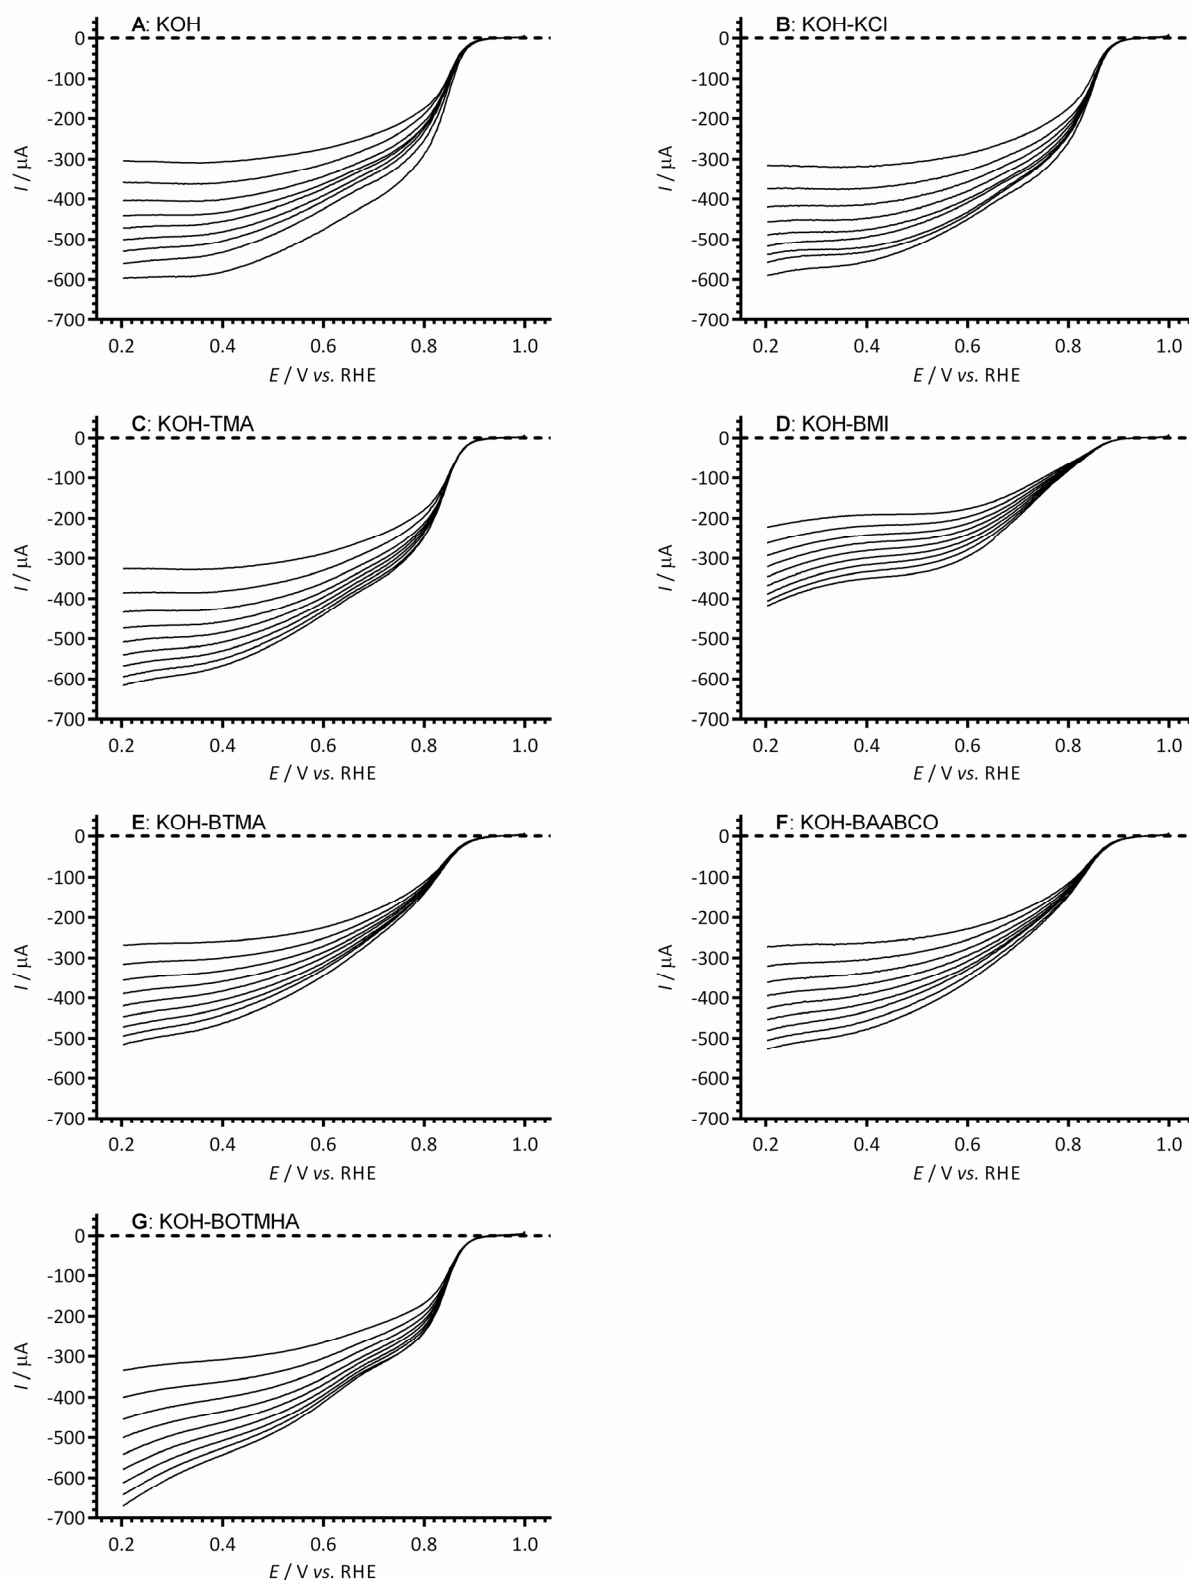

**Fig. ES12** The linear sweep hydrodynamic voltammograms at 25 °C of a polycrystalline Pt disk electrode in the  $O_2$ -saturated alkaline electrolytes with and without addition of 1 mmol  $dm^{-3}$  of KCl or the model cationic head-group molecules. Scan rate = 5 mV  $s^{-1}$  and RDE rotation rates in the range 400 - 2000 rpm. This is the raw data linked to Figure 6 and 7 and Table 1 in the main article.

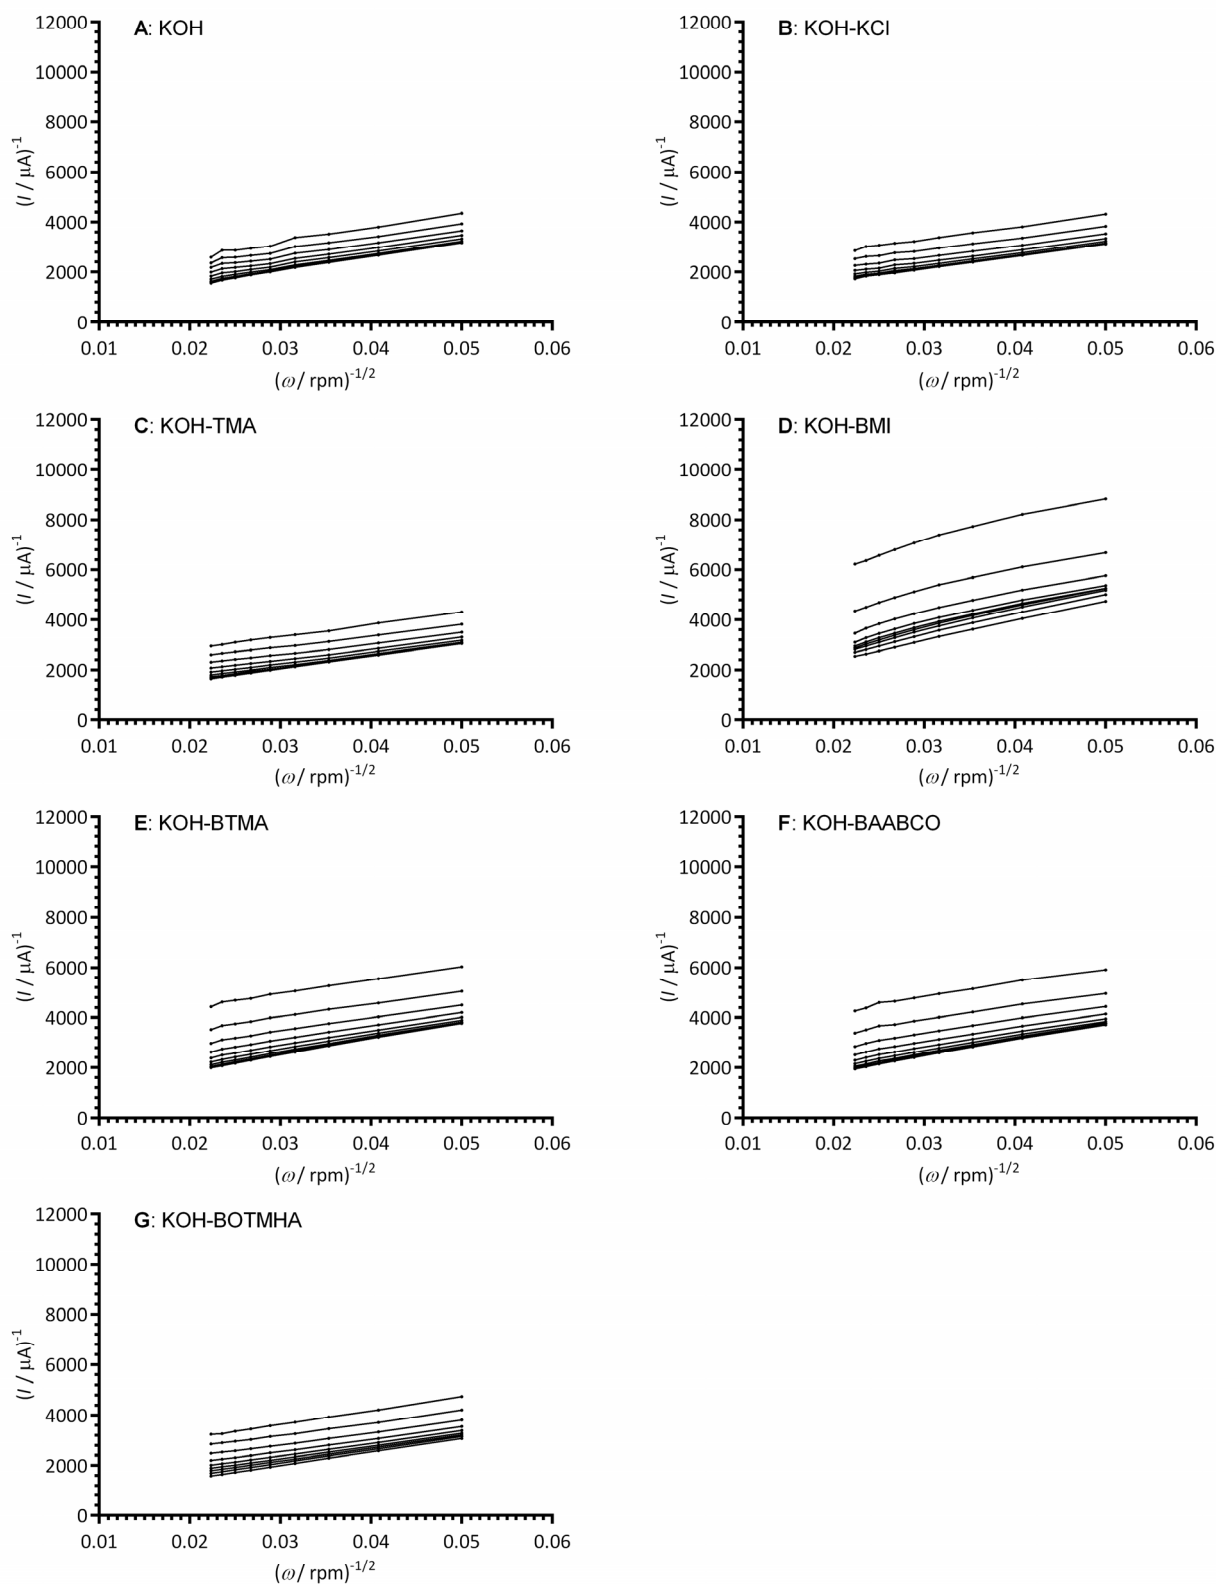

**Fig. ESI3** The Koutecky - Levich plots of a polycrystalline Pt disk electrode in the  $\text{O}_2$ -saturated alkaline electrolytes at 25 °C with and without addition of  $1 \text{ mmol dm}^{-3}$  of KCl or the model cationic head-group molecules. Scan rate =  $5 \text{ mV s}^{-1}$  and RDE rotation rates in the range 400 - 2000 rpm. This is the raw data linked to Figures 6 and 7 and Table 1 in the main article.
